# Supplementary material
Source: PubMed Central journal article supplement (PMC4182176)
Supplement: NIHMS618828-supplement-02.pdf [file NIHMS618828-supplement-02.pdf]

**Additional File 2:** Antibody recognition of HR97g is outcompeted by 100X HR97g peptide in 7-day old *Daphnia magna*

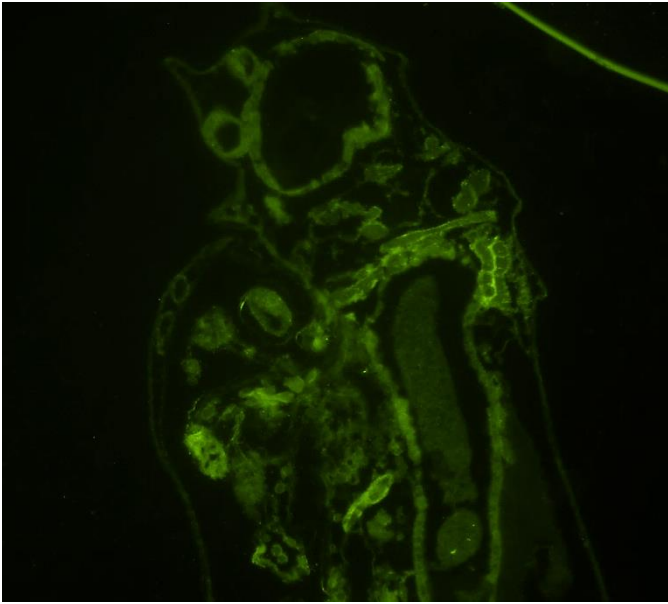

7day-D.magna-HR97g Ab

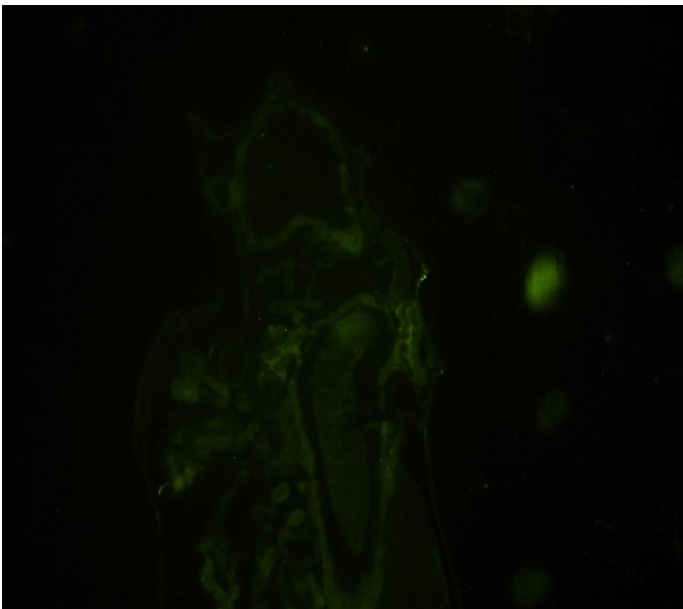

7day-D.magna-HR97g Ab + 1  
to 100 dilution with HR97g  
peptide

**Additional File 3:** Clustalx alignment file comparing the sequences of FinmagnaHR97a, Clem-magnaHR97a (Dmagna97a), and DappuHR97a.

**CLUSTAL ClustalW 2.0 MULTIPLE SEQUENCE ALIGNMENT**

File: C:/Documents and Settings/User/My Documents/Research/new manuscripts/Yan Daitan/1618/1618-54-1016  
 Page 1 of 1

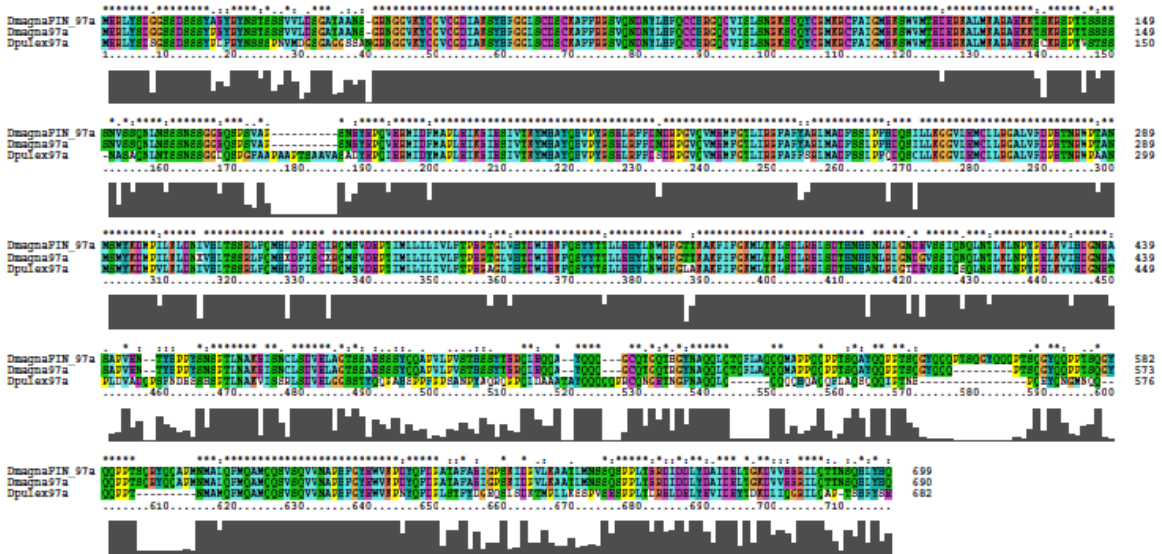

**Additional File 4:** Clustalx alignment file comparing the sequences of Fin-magnaHR97b, Clem-magnaHR97b (Dmagna97b), and DappuHR97b.

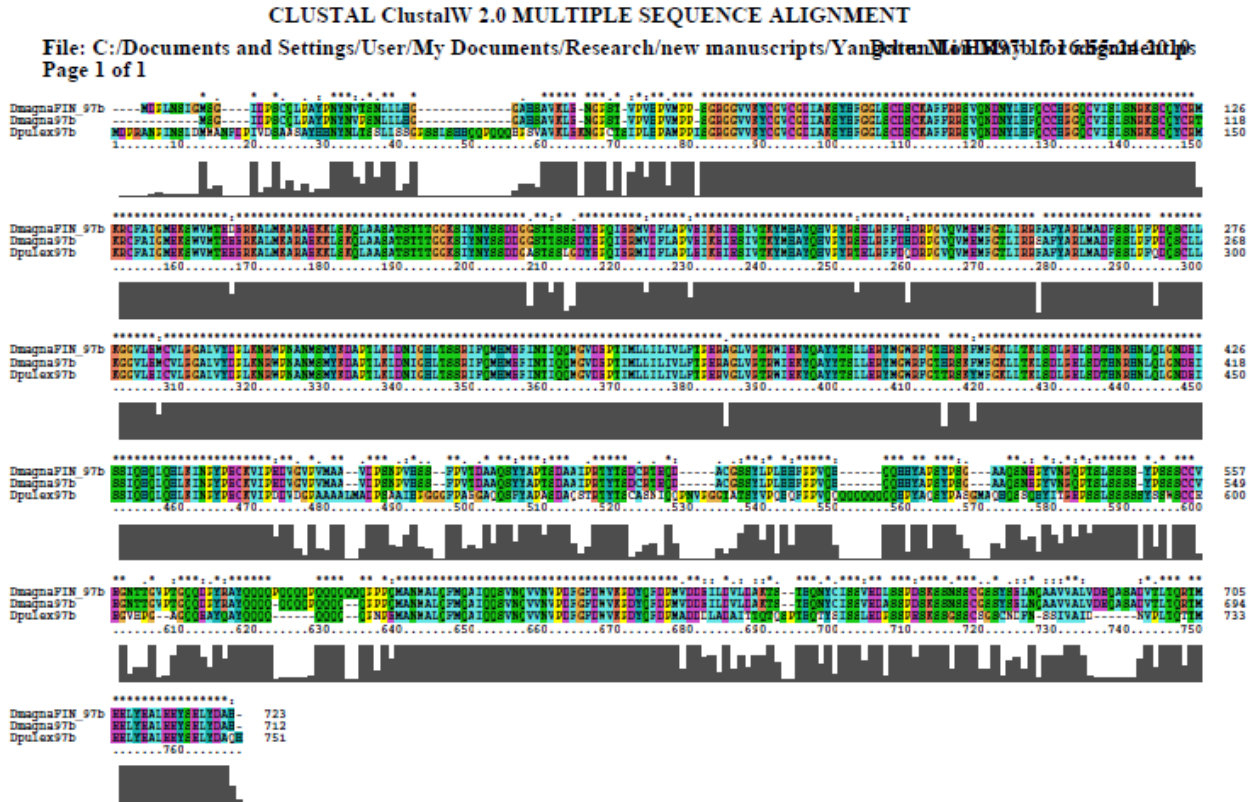



**Additional File 6: Base-contact residues for selected NR1I, NR1J, and NR1L members.** Each member of the NR1J group has the conserved ESCKAFFR base-contact residues as does HR97g, a member of the NR1L group. HR97a and HR97b show slight variation from the NR1J conserved base-contact residue sequence.

|            |         |                           |
|------------|---------|---------------------------|
| magnaHR97g | (NR1L3) | CC <b>ESCKAFFRR</b> AMQND |
| magnaHR97a | (NR1L1) | SCD <b>SCKAFFRR</b> SVQND |
| magnaHR97b | (NR1L2) | SCD <b>SCKAFFRR</b> SVQND |
| IsHR97     | (NR1L)  | SCD <b>SCKAFFRR</b> SVQNE |
| magnaHR96  | (NR1H)  | TC <b>ESCKAFFRR</b> NALKG |
| IsHR96     | (NR1H)  | TC <b>ESCKAFFRR</b> NAIKN |
| DHR96      | (NR1H)  | TC <b>ESCKAFFRR</b> NALAK |
| CeNHR48    | (NR1H)  | TC <b>ESCKAFFRR</b> NANKE |
| CionaVDRL  | (NR1I1) | TCE <b>GCKGFFRR</b> SVKNS |
| HsCAR      | (NR1I3) | TCE <b>GCKGFFRR</b> TVSKS |
| HsPXR      | (NR1I2) | TCE <b>GCKGFFRR</b> AMKRN |
